# Supplementary material
Source: Research Square preprint supplement (doi:10.21203/rs.3.rs-9141627/v1)
Supplement: Supplementary file 1 [file c8987c6e0ca8c6fca6c2c63f.docx]

Supplementary Table 1: ICD-10-CM diagnostic codes

| **Measures** | **ICD-10-CM diagnostic codes** |
| --- | --- |
| Neonatal respiratory disease syndrome (nRDS) | ICD-10-CM P22.0 |
| Bronchopulmonary dysplasia (BPD) | ICD-10-CM P27.1 |
| Chronic lung disease (CLD) | ICD-10-CM P27.9 |
| Major congenital heart disease (CHD) | ICD-10-CM: Q20.0–Q28.9 |
